# Supplementary material for: Green Fractionation and Structural Characterization of Lignin Nanoparticles via Carboxylic-Acid-Based Deep Eutectic Solvent (DES) Pretreatment
Source: MDPI journal article supplement (doi:10.3390/fermentation9050491), 2023-05-20
Supplement: s1 [file s1]

# Green Fractionation and Structural Characterization of Lignin Nanoparticles via Carboxylic-Acid-Based Deep Eutectic Solvent (DES) Pretreatment

Meng-Kai Qin <sup>†</sup>, Cheng Zuo <sup>†</sup>, Yi-Ting Yang, Yi-Hui Liu, Cheng-Ye Ma <sup>\*</sup>  
and Jia-Long Wen <sup>\*</sup>

<sup>1</sup> Beijing Key Laboratory of Lignocellulosic Chemistry, Beijing Forestry University, No. 35 Tsinghua East Road, Haidian District, Beijing 100083, China

<sup>\*</sup> Correspondence: Tel./Fax: +86-10-62336903;  
chengye.ma@foxmail.com (C.-Y.M.); wenjialong@bjfu.edu.cn (J.-L.W.)

<sup>†</sup> These authors contributed equally to this work.

## **1.1 Preparation of double enzymatic lignin (DEL)**

The ball-milled powder (5 g) was mixed with the desired amounts of sodium acetate buffer (pH 4.8) with a solid-to-liquid ratio of 1:20 (g/mL) and cellulase (35 FPU/g substrate). Then the mixture was incubated at 50 °C in a rotary shaker with a rotational velocity of 150 rpm for 48 h. Next, the mixture was centrifuged and the residue was washed thoroughly with sodium acetate buffer (pH 4.8) to remove the hydrolyzed carbohydrates, and then freeze-dried. Finally, the dried residual solid was repeatedly subjected to ball-milling for 2 h and enzymatic hydrolysis again as above-mentioned processes. After washing with acidic water (pH 2.0) and freeze-drying, DEL sample was obtained. To increase the solubility of the lignin in tetrahydrofuran (THF) for the molecular weights determination by GPC technique, the acetylation of lignin was performed.

## **1.2 Characterization of the lignin fractions**

The weight-average ( $M_w$ ) and number-average ( $M_n$ ) molecular weights of the lignin samples were determined by gel permeation chromatography (GPC) (Agilent 1200, Agilent Technologies, USA) with an ultraviolet detector (UV) at 240 nm. The column used was a PL-gel 10 mm mixed-B 7.5 mm i.d. column, which was calibrated with PL polystyrene standards according to a previous report (Shen et al., 2016a). NMR spectra of lignin samples were recorded on a Bruker AVIII 400 MHz spectrometer at 25 °C in DMSO-*d*<sub>6</sub>. The quantitative 2D-HSQC experiments were conducted according to previous literatures (Crestini & Argyropoulos, 1997; Wen et al., 2015). Quantitative <sup>31</sup>P

NMR spectra were acquired according to previous literatures (Crestini & Argyropoulos, 1997; Pu et al., 2011; Wen et al., 2015). In detail, 20 mg of lignin was dissolved in 500  $\mu$ L of anhydrous pyridine and deuterated chloroform (1.6:1, v/v) under stirring. This was followed by the addition 100  $\mu$ L of cyclohexanol (10.85 mg/mL in anhydrous pyridine and deuterated chloroform 1.6:1, v/v) as an internal standard and 100  $\mu$ L of chromium(III) acetylacetonate solution (5 mg/mL in anhydrous pyridine and deuterated chloroform 1.6:1, v/v) as the relaxation reagent. After that, the mixture was reacted with 100  $\mu$ L of phosphitylating reagent (2-chloro-4,4,5,5-tetramethyl-1,3,2-dioxaphospholane, TMDP) for about 10 min and was transferred into a 5 mm NMR tube for subsequent  $^{31}\text{P}$  NMR analysis. FT-IR spectra of lignin preparations were obtained using a Thermo Scientific Nicolet iN10 FT-IR microscope (Thermo Nicolet Corp., Madison, WI, USA) equipped with liquid nitrogen cooled MCT detector. The SEM analysis of lignin were performed using a S-3400N II SEM operating at 10 kV acceleration voltages. All samples were coated with gold prior to acquiring images. The nanoparticle size analysis of DES lignin was determined by dynamic light scattering technique (Anton Paar Litesizer 500, Italy) using water as the dispersing medium. The Litesizer 500 has a 40 mW semiconductor red laser with a wavelength of 658 nm. A total of 1 mg of the DES lignin was added to 10 mL of water, and then placed in the cuvette for a light scattering determination of particle size.

### **1.3 Antioxidant activities**

The antioxidant activities of lignins were estimated using 2,2-diphenyl-1-picryl-

hydrazyl (DPPH) free radical in methanol solution. Concretely, 0.64 mL of lignin solutions (0.01-1.00 mg/mL) in dioxane-water (9/1, v/v) was mixed with 2.36 mL of a 24.5 mg/L DPPH methanol solution at 25 °C for 16 min. The concentrations of DPPH radicals at 0 and 16 min were monitored at 515 nm ( $\lambda$  max) using an ultraviolet/visible spectrophotometer (Tec comp, UV 2300). The inhibition percentage (IP) of the DPPH radical was calculated using the following equation. The inhibition percentage was plotted as a function of the lignin concentration. In the graph the 50% IP concentration of the lignin needed to obtain was determined and defined as IC<sub>50</sub>. The radical scavenging activity of the lignin was characterized using the term of radical scavenging index (RSI), which was defined as the inverse of IC<sub>50</sub>. According to the definitions, higher antioxidant activity results in a lower value of IC<sub>50</sub> and higher value of RSI. Moreover, the antioxidant activities of the two typical commercial antioxidants, butylated hydroxyanisole (BHA) and 2,6-di-tert-bntyl-p-cresol (BHT), were determined using the same method.

$$IP(\%) = \frac{\text{absorbance}_{t=0\text{min}} - \text{absorbance}_{t=16\text{min}}}{\text{absorbance}_{t=0\text{min}}} \times 100\%$$

**Table S1.** Pretreatment performance analysis (%)

| Sample  | Dehemicellulose ratio | Delignification ratio |
|---------|-----------------------|-----------------------|
| R-SA120 | 74.93                 | 70.40                 |
| R-SA130 | 77.48                 | 74.19                 |
| R-SA140 | 85.30                 | 82.07                 |
| R-SA150 | 87.44                 | 86.42                 |
| R-PA140 | 88.86                 | 88.98                 |
| R-GA140 | 74.05                 | 72.59                 |
| R-MA140 | 88.15                 | 85.30                 |
| R-TA140 | 91.34                 | 90.93                 |

**Table S2.** Quantification of lignin fractions by quantitative 2D-HSQC NMR spectroscopy.

| Sample  | $\beta$ -O-4 <sup>a</sup> | $\beta$ - $\beta$ | $\beta$ -5 | PB    | S/G <sup>b</sup> |
|---------|---------------------------|-------------------|------------|-------|------------------|
| DEL     | 59.86                     | 6.71              | 1.51       | 19.67 | 2.75             |
| L-SA120 | 35.91                     | 7.22              | 4.8        | 21.83 | 1.18             |
| L-SA130 | 31.88                     | 6.21              | 4.44       | 21.51 | 1.24             |
| L-SA140 | 18.32                     | 4.95              | 3.84       | 19.36 | 1.44             |
| L-SA150 | 15.87                     | 3.84              | 4.71       | 18.23 | 1.49             |
| L-PA140 | 18.14                     | 5.02              | 3.85       | 18.86 | 1.46             |
| L-GA140 | 38.17                     | 4.89              | 3.90       | 23.63 | 1.35             |
| L-MA140 | 17.65                     | 7.01              | 4.26       | 15.58 | 1.65             |
| L-TA140 | 9.53                      | 3.57              | 3.14       | 13.77 | 2.20             |

<sup>a</sup> Result expressed per 100 Ar based on quantitative 2D-HSQC spectra.

<sup>b</sup> S/G ratio obtained by this equation: S/G ratio =  $0.5 \times I(S_{2,6})/I(G_2)$ .

**Table S3.** Molecular weights of the lignin fractions

| Sample  | M <sub>w</sub> | M <sub>n</sub> | PDI  |
|---------|----------------|----------------|------|
| DEL     | 7230±60        | 3820±40        | 1.89 |
| L-SA120 | 1980±20        | 1250±20        | 1.58 |
| L-SA130 | 1510±20        | 1010±20        | 1.50 |
| L-SA140 | 1290±20        | 980±10         | 1.32 |
| L-SA150 | 1450±30        | 1020±20        | 1.42 |
| L-PA140 | 1210±20        | 980±10         | 1.23 |
| L-GA140 | 1570±30        | 1060±20        | 1.48 |
| L-MA140 | 1240±20        | 970±10         | 1.28 |
| L-TA140 | 1280±20        | 970±10         | 1.32 |

**Table S4.** The antioxidant activity of the lignin preparations, as well as that of 2,6-di-tert-bntylp-cresol (BHT).

| Sample  | EC <sub>50</sub> (µg/mL) | RSI   |
|---------|--------------------------|-------|
| L-SA120 | 80.26±2.9                | 12.46 |
| L-SA130 | 67.52±2.1                | 14.81 |
| L-SA140 | 52.85±2.4                | 18.92 |
| L-SA150 | 49.41±1.9                | 20.24 |
| L-PA140 | 52.33±2.1                | 19.11 |
| L-GA140 | 65.27±1.8                | 15.32 |
| L-MA140 | 51.68±2.0                | 19.35 |
| L-TA140 | 46.4±2.2                 | 21.55 |
| BHT     | 505.05±1.9               | 1.98  |



**Table S5. Main assignments of lignin fractions in FT-IR bands**

| Frequency (cm <sup>-1</sup> ) | Assignment                            | Comments                                                                                                                                                             |
|-------------------------------|---------------------------------------|----------------------------------------------------------------------------------------------------------------------------------------------------------------------|
| 3000-2840                     | $\nu$ (C-H)                           | C-H stretching vibrations in methyl and methylene of side chains                                                                                                     |
| 1738-1709                     | $\nu$ (C=O)                           | C=O stretching in unconjugated ketone, carbonyl and ester; C=O stretching in conjugated aldehydes and carboxylic acids absorb around and below 1700 cm <sup>-1</sup> |
| 1699-1633                     | $\nu$ (C=O)                           | C=O stretching in conjugated aldehydes and carboxylic acids absorb around and below 1700 cm <sup>-1</sup>                                                            |
| 1684                          | $\nu$ (C=O)                           | $\beta$ -enone carbonyl stretching modes                                                                                                                             |
| 1655-1675                     | $\nu$ (C=O)                           | C=O stretching in conjugated para-substitute aryl ketones                                                                                                            |
| 1593-1605                     | $\nu$ (Ar), $\nu$ (C=O)               | Aromatic skeletal vibrations of S and G (S>G) plus C=O Stretching; S > G and G Condensed > G etherified                                                              |
| 1510                          | $\nu$ (Ar)                            | Aromatic skeletal vibrations of S and G (G > S)                                                                                                                      |
| 1460                          | $\nu$ (C-H)                           | Asymmetric C-H deformations in -CH <sub>3</sub> and -CH <sub>2</sub>                                                                                                 |
| 1420                          | $\nu$ (Ar)                            | Aromatic skeletal vibrations combined with C-H in plane deform                                                                                                       |
| 1365-1370                     | $\nu$ (C-H), $\nu$ (O-H)              | Aliphatic C-H stretching in CH <sub>3</sub> and phenolic OH                                                                                                          |
| 1267                          | $\nu$ (Ar), $\nu$ (C=O)               | G ring and C=O stretching                                                                                                                                            |
| 1221-1230                     | $\nu$ (C=O), $\nu$ (C-O), $\nu$ (C-C) | C-C, C-O and C=O stretching (G condensed > G etherified)                                                                                                             |
| 1167                          | $\nu$ (C=O)                           | Typical for HGS type lignin; C=O stretching in conjugated ketone, ester groups                                                                                       |
| 1124                          | $\nu$ (C-H)                           | Aromatic C-H bending in-plane (typical for S units)                                                                                                                  |
| 1030-1035                     | $\nu$ (C-H)                           | The aromatic C-H deformation acting as a complex vibration associated with the C-O, C-C stretching and C-OH bending                                                  |
| 966-990                       | $\nu$ (-HC=CH-)                       | -HC=CH- out of plane deformation, (trans)                                                                                                                            |
| 853-858                       | $\nu$ (C-H)                           | C-H out of plane in position 2, 5, and 6 of G units                                                                                                                  |
| 834                           | $\nu$ (C-H)                           | C-H out of plane in position 2 and 6 of S units, and in all positions of H units                                                                                     |
