# Supplementary material for: Green Fractionation and Structural Characterization of Lignin Nanoparticles via Carboxylic-Acid-Based Deep Eutectic Solvent (DES) Pretreatment
Source: MDPI journal article supplement (doi:10.3390/fermentation9050491), 2023-05-20
Supplement: s1 [file s1]

Archive with 1 entries (1 files):
- fermentation-2346151-supplementary.pdf
